# Supplementary material for: Population Genetics of Lactobacillus sakei Reveals Three Lineages with Distinct Evolutionary Histories
Source: PubMed Central journal article supplement (PMC3777942; doi:10.1371/journal.pone.0073253), 2013-09-19

Figure S2

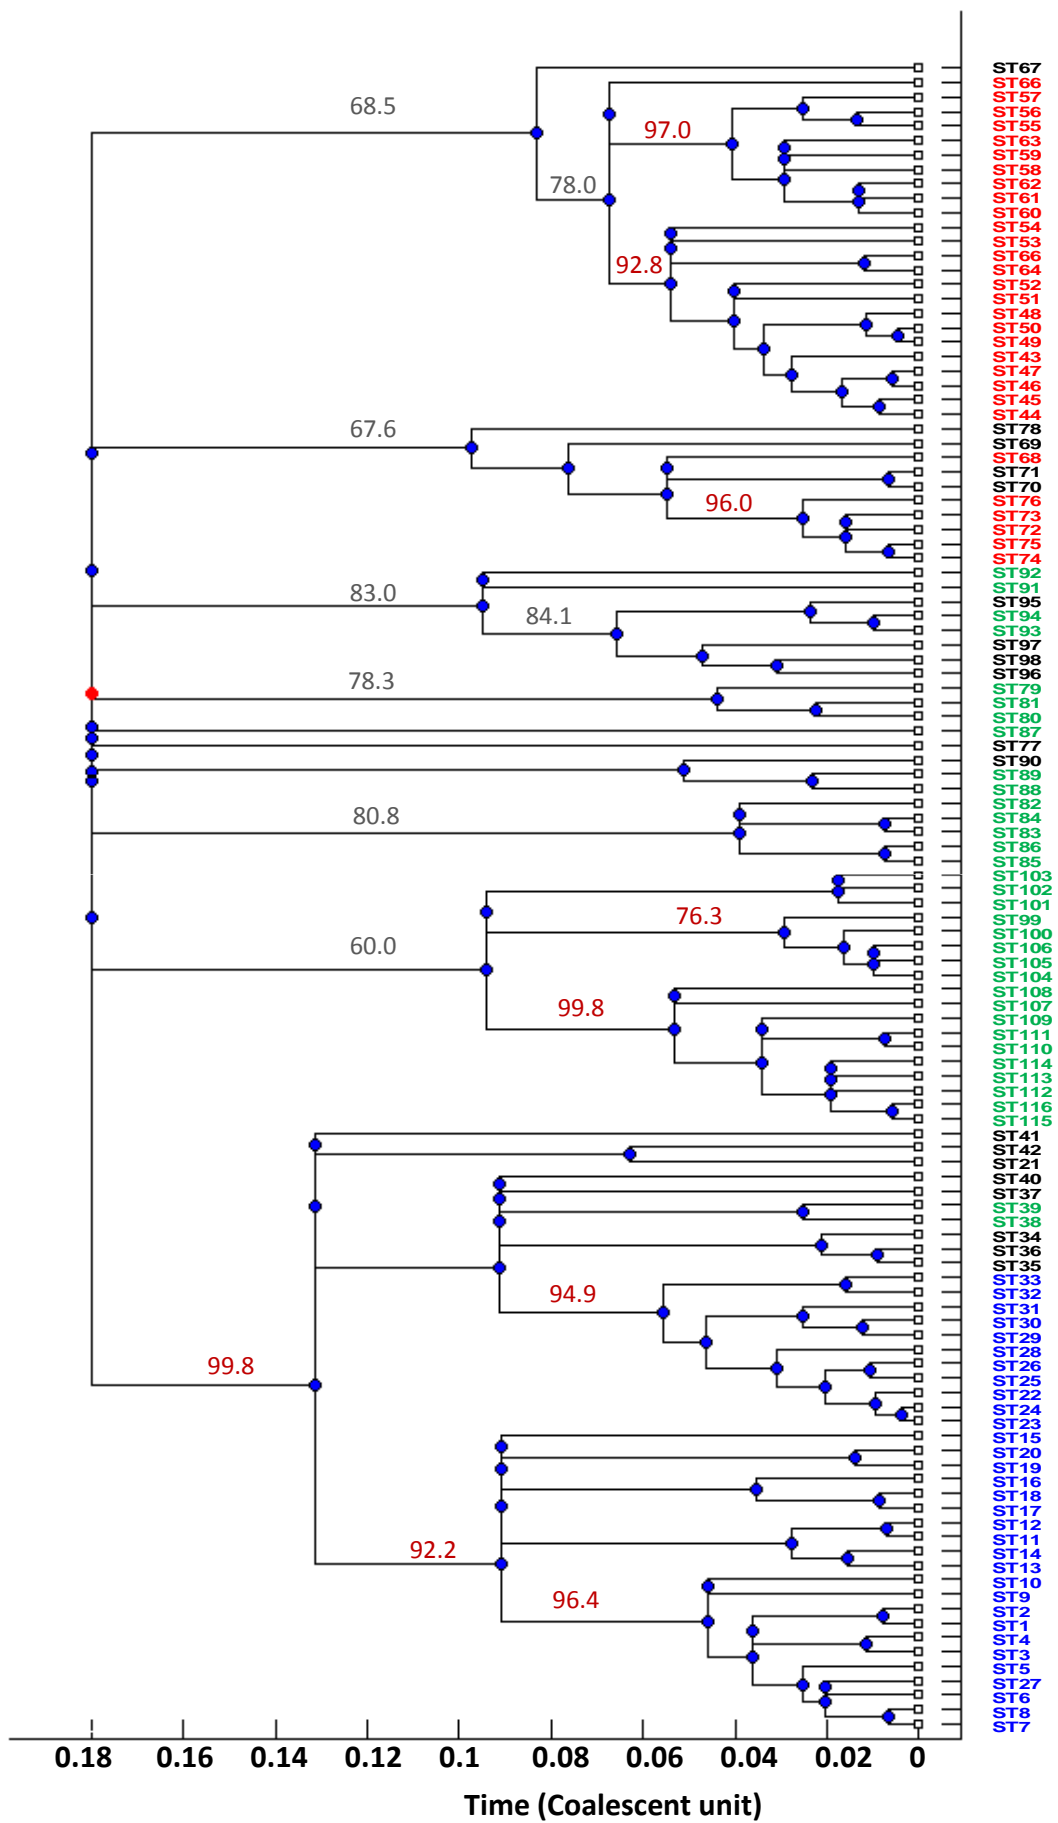

Supplement: pone.0073253.s002.pdf [file pone.0073253.s002.pdf]
