# Supplementary material for: Population Genetics of Lactobacillus sakei Reveals Three Lineages with Distinct Evolutionary Histories
Source: PubMed Central journal article supplement (PMC3777942; doi:10.1371/journal.pone.0073253), 2013-09-19
Supplement: pone.0073253.s004.pdf [file pone.0073253.s004.pdf]

| Name of Isolate | Sequence Type | Lineage | Clonal Complex | Genotype [ref. 11] | Allelic profile |      |      |      |      |      |      |      | Isolation source                                  | Date      | Laboratory Collection                                       | Reference   | Genome in kb |
|-----------------|---------------|---------|----------------|--------------------|-----------------|------|------|------|------|------|------|------|---------------------------------------------------|-----------|-------------------------------------------------------------|-------------|--------------|
|                 |               |         |                |                    | tuf             | recA | glpF | pepV | ldhL | rpoB | dnaK | hemN |                                                   |           |                                                             |             |              |
| CIP105422       | ST1           | 3       | CC3A           | G                  | 1               | 1    | 1    | 1    | 1    | 1    | 1    | 1    | Raw German-type Sausage                           | 1990      | Institute of Meat Hygiene, Berlin, Germany                  | [9]         | 2077         |
| CRL1757         | ST1           | 3       | CC3A           |                    | 1               | 1    | 1    | 1    | 1    | 1    | 1    | 1    | Fresh anchovies                                   | 2008      | CERELA, Tucumán, Argentina                                  | Unpublished |              |
| 112             | ST2           | 3       | CC3A           | B                  | 1               | 1    | 1    | 1    | 2    | 1    | 1    | 1    | French dry-type sausage                           | 1990-1992 | INRA, Jouy-en-Josas, France                                 | [10]        | 2152         |
| 134             | ST2           | 3       | CC3A           |                    | 1               | 1    | 1    | 1    | 2    | 1    | 1    | 1    | French dry-type sausage                           | 1990-1992 | INRA, Jouy-en-Josas, France                                 | [10]        |              |
| 129             | ST2           | 3       | CC3A           |                    | 1               | 1    | 1    | 1    | 2    | 1    | 1    | 1    | French dry-type sausage                           | 1990-1992 | INRA, Jouy-en-Josas, France                                 | [10]        |              |
| 113             | ST2           | 3       | CC3A           |                    | 1               | 1    | 1    | 1    | 2    | 1    | 1    | 1    | French dry-type sausage                           | 1990-1992 | INRA, Jouy-en-Josas, France                                 | [10]        |              |
| FLECO1          | ST3           | 3       | CC3A           |                    | 1               | 1    | 1    | 1    | 2    | 9    | 1    | 1    | Human feces                                       | 2008      | INRA, Jouy-en-Josas, France                                 | [42]        | 1966         |
| PFHL-F1         | ST3           | 3       | CC3A           |                    | 1               | 1    | 1    | 1    | 2    | 9    | 1    | 1    | Fresh Duck breast                                 | 2006      | INRA, Jouy-en-Josas, France                                 | Unpublished |              |
| 205             | ST3           | 3       | CC3A           | B                  | 1               | 1    | 1    | 1    | 2    | 9    | 1    | 1    | Vacuum-Packed beef                                | 1987      | INRA, Jouy-en-Josas, France                                 | [37]        | 1825         |
| ADIV-DM3        | ST3           | 3       | CC3A           |                    | 1               | 1    | 1    | 1    | 2    | 9    | 1    | 1    | Traditional dry-type French Sausage               | Not known | ADIV, Clermont-Ferrand, France                              | Unpublished |              |
| MFPC15A28-05    | ST3           | 3       | CC3A           |                    | 1               | 1    | 1    | 1    | 2    | 9    | 1    | 1    | Vacuum Packed beef carpaccio                      | 2009      | INRA, Jouy-en-Josas, France                                 | [31]        |              |
| MFPA29D07-01    | ST3           | 3       | CC3A           |                    | 1               | 1    | 1    | 1    | 2    | 9    | 1    | 1    | Modified-Atmosphere Packed organic beef carpaccio | 2009      | INRA, Jouy-en-Josas, France                                 | [31]        |              |
| AUA-985         | ST4           | 3       | CC3A           |                    | 1               | 1    | 1    | 1    | 4    | 9    | 1    | 2    | Industrial dry-type Greek sausages                | 2007      | Agricultural University, Athens, Greece                     | Unpublished |              |
| 324             | ST5           | 3       | CC3A           |                    | 1               | 1    | 1    | 1    | 4    | 3    | 1    | 2    | Vacuum-Packed pork                                | 1987      | INRA, Jouy-en-Josas, France                                 | [37]        |              |
| 331             | ST6           | 3       | CC3A           | B                  | 1               | 1    | 1    | 1    | 4    | 3    | 5    | 2    | Vacuum-Packed pork                                | 1987      | INRA, Jouy-en-Josas, France                                 | [37]        | 2208         |
| LTH673          | ST7           | 3       | CC3A           | G                  | 1               | 1    | 1    | 1    | 4    | 3    | 5    | 3    | German moist-type fermented sausage               | 1991      | Institut Für Libbensmitteltechnologie, Hohenheim, Germany   | [48]        | 2092         |
| LV92            | ST7           | 3       | CC3A           | G                  | 1               | 1    | 1    | 1    | 4    | 3    | 5    | 3    | Bacon                                             | 1983      | Meat Research Institute, Bristol, UK                        | [47]        |              |
| AGR63           | ST7           | 3       | CC3A           |                    | 1               | 1    | 1    | 1    | 4    | 3    | 5    | 3    | Vacuum-packed beef                                | 2008      | AgResearch, Hamilton, New-Zealand                           | [6]         |              |
| SAM125          | ST7           | 3       | CC3A           |                    | 1               | 1    | 1    | 1    | 4    | 3    | 5    | 3    | Greek-type dry salami                             | 1994      | National Agricultural Research Foundation, Ioannina, Greece | [44]        |              |
| LV52            | ST7           | 3       | CC3A           | G                  | 1               | 1    | 1    | 1    | 4    | 3    | 5    | 3    | Vacuum-packed lamb meat                           | 1983      | Meat Research Institute, Bristol, UK                        | [47]        | 2162         |
| 91              | ST7           | 3       | CC3A           |                    | 1               | 1    | 1    | 1    | 4    | 3    | 5    | 3    | French dry-type sausage                           | 1990-1992 | INRA, Jouy-en-Josas, France                                 | [10]        |              |
| 48              | ST7           | 3       | CC3A           |                    | 1               | 1    | 1    | 1    | 4    | 3    | 5    | 3    | French dry-type sausage                           | 1990-1992 | INRA, Jouy-en-Josas, France                                 | [10]        |              |
| SAM517          | ST7           | 3       | CC3A           |                    | 1               | 1    | 1    | 1    | 4    | 3    | 5    | 3    | Greek-type dry salami                             | 1994      | National Agricultural Research Foundation, Ioannina, Greece | [44]        |              |
| LV59            | ST7           | 3       | CC3A           | G                  | 1               | 1    | 1    | 1    | 4    | 3    | 5    | 3    | Vacuum-packed lamb meat                           | 1983      | Meat Research Institute, Bristol, UK                        | [47]        | 2029         |
| MFPA29D07-04    | ST7           | 3       | CC3A           |                    | 1               | 1    | 1    | 1    | 4    | 3    | 5    | 3    | Modified-Atmosphere Packed organic beef carpaccio | 2009      | INRA, Jouy-en-Josas, France                                 | [31]        |              |
| 195             | ST7           | 3       | CC3A           | G                  | 1               | 1    | 1    | 1    | 4    | 3    | 5    | 3    | Vacuum-Packed beef                                | 1987      | INRA, Jouy-en-Josas, France                                 | [37]        | 2039         |
| ADIV-L28        | ST7           | 3       | CC3A           |                    | 1               | 1    | 1    | 1    | 4    | 3    | 5    | 3    | Industrial dry-type French sausage                | Not known | ADIV, Clermont-Ferrand, France                              | Unpublished |              |
| SAM234          | ST8           | 3       | CC3A           |                    | 1               | 1    | 1    | 2    | 4    | 3    | 5    | 3    | Greek-type dry salami                             | 1994      | National Agricultural Research Foundation, Ioannina, Greece | [44]        |              |
| AGR27           | ST8           | 3       | CC3A           |                    | 1               | 1    | 1    | 2    | 4    | 3    | 5    | 3    | Vacuum-packed beef                                | 2008      | AgResearch, Hamilton, New-Zealand                           | [6]         |              |
| AGR44           | ST9           | 3       | CC3A           |                    | 1               | 1    | 10   | 1    | 2    | 1    | 1    | 1    | Vacuum-packed beef                                | 2008      | AgResearch, Hamilton, New-Zealand                           | [6]         |              |
| LTH5589         | ST10          | 3       | CC3A           | C                  | 1               | 1    | 10   | 1    | 4    | 1    | 1    | 2    | Human feces                                       | 2002      | Institut Für Libbensmitteltechnologie, Hohenheim, Germany   | [39]        | 2142         |
| YMH243          | ST10          | 3       | CC3A           | C                  | 1               | 1    | 10   | 1    | 4    | 1    | 1    | 2    | Fresh meat                                        | 1986      | National Institute of Health, Tokyo, Japan                  | [41]        | 1980         |
| LTH5588         | ST11          | 3       | CC3A           | B                  | 1               | 1    | 10   | 2    | 2    | 9    | 7    | 2    | Human feces                                       | 2002      | Institut Für Libbensmitteltechnologie, Hohenheim, Germany   | [39]        | 1909         |
| LTH1650         | ST12          | 3       | CC3A           |                    | 3               | 1    | 10   | 2    | 2    | 9    | 7    | 2    | Starter strain for German-type sausages           | not known | Institut Für Libbensmitteltechnologie, Hohenheim, Germany   | Unpublished |              |
| L110            | ST12          | 3       | CC3A           | B                  | 3               | 1    | 10   | 2    | 2    | 9    | 7    | 2    | Starter strain for French-type sausages           | 1987      | INRA, Jouy-en-Josas, France                                 | [37]        | 1863         |
| 475             | ST12          | 3       | CC3A           |                    | 3               | 1    | 10   | 2    | 2    | 9    | 7    | 2    | Vacuum-Packed beef                                | 1987      | INRA, Jouy-en-Josas, France                                 | [37]        |              |
| LTH1182         | ST12          | 3       | CC3A           |                    | 3               | 1    | 10   | 2    | 2    | 9    | 7    | 2    | German-type sausage                               | 1991      | Institut Für Libbensmitteltechnologie, Hohenheim, Germany   | [48]        |              |
| MF2092          | ST13          | 3       | CC3A           | H                  | 5               | 1    | 10   | 1    | 1    | 1    | 7    | 2    | Smoked Salmon                                     | 2004      | NOFIMA, Åas, Norway                                         | [11]        | 2059         |
| MF1048          | ST13          | 3       | CC3A           | H                  | 5               | 1    | 10   | 1    | 1    | 1    | 7    | 2    | Smoked Salmon                                     | 2004      | NOFIMA, Åas, Norway                                         | [11]        | 1942         |
| 186             | ST14          | 3       | CC3A           |                    | 5               | 1    | 10   | 2    | 2    | 1    | 7    | 2    | French dry-type sausage                           | 1990-1992 | INRA, Jouy-en-Josas, France                                 | [10]        |              |
| BMG.167         | ST14          | 3       | CC3A           |                    | 5               | 1    | 10   | 2    | 2    | 1    | 7    | 2    | Fresh sheep meat (north of Tunisia)               | 2008      | University of Tunis, Tunis, Tunisia                         | [43]        | 2065         |
| 710             | ST15          | 3       | CC3A           | B                  | 5               | 1    | 10   | 2    | 2    | 1    | 1    | 1    | French dry-type sausage                           | 1990-1992 | INRA, Jouy-en-Josas, France                                 | [10]        | 2244         |
| AUA-MOM12.2     | ST16          | 3       | CC3A           |                    | 5               | 1    | 10   | 1    | 4    | 3    | 3    | 4    | Chilled minced beef meat                          | 2008      | Agricultural University, Athens, Greece                     | Unpublished |              |
| 179             | ST17          | 3       | CC3A           |                    | 6               | 1    | 10   | 1    | 4    | 3    | 5    | 1    | French dry-type sausage                           | 1990-1992 | INRA, Jouy-en-Josas, France                                 | [10]        |              |
| 184             | ST18          | 3       | CC3A           |                    | 6               | 1    | 10   | 1    | 4    | 3    | 5    | 2    | French dry-type sausage                           | 1990-1992 | INRA, Jouy-en-Josas, France                                 | [10]        |              |
| MFPC40D14-03    | ST19          | 3       | CC3A           |                    | 5               | 1    | 10   | 1    | 7    | 1    | 1    | 5    | Vacuum Packed beef carpaccio                      | 2009      | INRA, Jouy-en-Josas, France                                 | [31]        |              |
| BMG.168         | ST20          | 3       | CC3A           |                    | 5               | 1    | 10   | 1    | 4    | 1    | 1    | 5    | Fresh sheep meat (north of Tunisia)               | 2008      | University of Tunis, Tunis, Tunisia                         | [43]        | 2069         |
| MFPA43D07-02    | ST20          | 3       | CC3A           |                    | 5               | 1    | 10   | 1    | 4    | 1    | 1    | 5    | Modified-Atmosphere Packed organic beef carpaccio | 2009      | INRA, Jouy-en-Josas, France                                 | [31]        |              |
| MFPC24A28-04    | ST20          | 3       | CC3A           |                    | 5               | 1    | 10   | 1    | 4    | 1    | 1    | 5    | Vacuum Packed beef carpaccio                      | 2009      | INRA, Jouy-en-Josas, France                                 | [31]        |              |
| MFPA42D07-02    | ST20          | 3       | CC3A           |                    | 5               | 1    | 10   | 1    | 4    | 1    | 1    | 5    | Modified-Atmosphere Packed organic beef carpaccio | 2009      | INRA, Jouy-en-Josas, France                                 | [31]        |              |
| MFPA44D07-02    | ST20          | 3       | CC3A           |                    | 5               | 1    | 10   | 1    | 4    | 1    | 1    | 5    | Modified-Atmosphere Packed organic beef carpaccio | 2009      | INRA, Jouy-en-Josas, France                                 | [31]        |              |
| BMG.73          | ST21          | Admixed | singleton      |                    | 5               | 3    | 10   | 1    | 4    | 1    | 2    | 10   | Tunisian ground beef meat                         | 2008      | University of Tunis, Tunis, Tunisia                         | [43]        | 1980         |
| BMG.51          | ST21          | Admixed | singleton      |                    | 5               | 3    | 10   | 1    | 4    | 1    | 2    | 10   | Fresh sheep meat (south of Tunisia)               | 2008      | University of Tunis, Tunis, Tunisia                         | [43]        | 2006         |

| Name of Isolate | Sequence Type | Lineage | Clade     | Genotype [ref. 11] | Allelic profile |      |      |      |      |      |      |      |                                                   | Isolation source | Date                                                        | Laboratory Collection | Reference | Genome in kb |
|-----------------|---------------|---------|-----------|--------------------|-----------------|------|------|------|------|------|------|------|---------------------------------------------------|------------------|-------------------------------------------------------------|-----------------------|-----------|--------------|
|                 |               |         |           |                    | tuf             | recA | glpF | pepV | ldhL | rpoB | dnaK | hemN |                                                   |                  |                                                             |                       |           |              |
| MF2091          | ST22          | 3       | CC3B      | B                  | 1               | 1    | 1    | 2    | 2    | 3    | 5    | 14   | Smoked Salmon                                     | 2004             | NOFIMA, Åas, Norway                                         | [11]                  | 1880      |              |
| BMG.126         | ST23          | 3       | CC3B      |                    | 1               | 1    | 1    | 8    | 2    | 3    | 5    | 14   | Tunisian Beef packaged sausage                    | 2008             | University of Tunis, Tunis, Tunisia                         | [43]                  | 1898      |              |
| MFPA22D06-02    | ST23          | 3       | CC3B      |                    | 1               | 1    | 1    | 8    | 2    | 3    | 5    | 14   | Modified-Atmosphere Packed organic beef carpaccio | 2009             | INRA, Jouy-en-Josas, France                                 | [31]                  |           |              |
| MFPB16D07-01    | ST23          | 3       | CC3B      |                    | 1               | 1    | 1    | 8    | 2    | 3    | 5    | 14   | Modified-Atmosphere Packed beef carpaccio         | 2009             | INRA, Jouy-en-Josas, France                                 | [31]                  |           |              |
| MFPB17D07-03    | ST23          | 3       | CC3B      |                    | 1               | 1    | 1    | 8    | 2    | 3    | 5    | 14   | Modified-Atmosphere Packed beef carpaccio         | 2009             | INRA, Jouy-en-Josas, France                                 | [31]                  |           |              |
| MF2090          | ST24          | 3       | CC3B      | B                  | 1               | 1    | 1    | 8    | 3    | 3    | 5    | 14   | Fermented trout (Rakfisk)                         | 2004             | NOFIMA, Åas, Norway                                         | [11]                  | 1904      |              |
| MF2089          | ST24          | 3       | CC3B      | B                  | 1               | 1    | 1    | 8    | 3    | 3    | 5    | 14   | Fermented trout (Rakfisk)                         | 2004             | NOFIMA, Åas, Norway                                         | [11]                  | 1917      |              |
| 54              | ST25          | 3       | CC3B      |                    | 1               | 1    | 1    | 8    | 2    | 3    | 20   | 14   | French dry-type sausage                           | 1990-1992        | INRA, Jouy-en-Josas, France                                 | [10]                  |           |              |
| MFPA24A14-01    | ST26          | 3       | CC3B      |                    | 1               | 1    | 1    | 2    | 2    | 9    | 20   | 14   | Modified-Atmosphere Packed organic beef carpaccio | 2009             | INRA, Jouy-en-Josas, France                                 | [31]                  |           |              |
| CTC429          | ST27          | 3       | CC3B      | G                  | 1               | 1    | 1    | 2    | 5    | 3    | 16   | 1    | Spanish dry-type sausage                          | 1993             | IRTA, Monells, Spain                                        | [40]                  | 2139      |              |
| 511             | ST28          | 3       | CC3B      |                    | 1               | 1    | 10   | 1    | 2    | 3    | 21   | 14   | Vacuum-Packed pork                                | 1987             | INRA, Jouy-en-Josas, France                                 | [37]                  | 2186      |              |
| 332             | ST29          | 3       | CC3B      | I                  | 1               | 1    | 10   | 8    | 2    | 6    | 7    | 12   | Vacuum-Packed pork                                | 1987             | INRA, Jouy-en-Josas, France                                 | [37]                  |           |              |
| 60              | ST30          | 3       | CC3B      |                    | 1               | 1    | 10   | 8    | 2    | 3    | 19   | 12   | French dry-type sausage                           | 1990-1992        | INRA, Jouy-en-Josas, France                                 | [10]                  |           |              |
| SF841           | ST31          | 3       | CC3B      | D                  | 1               | 1    | 10   | 4    | 2    | 3    | 20   | 12   | Smoked Salmon                                     | 2006             | IFREMER, Nantes, France                                     | [32]                  | 2057      |              |
| SF843           | ST31          | 3       | CC3B      | D                  | 1               | 1    | 10   | 4    | 2    | 3    | 20   | 12   | Smoked Salmon                                     | 2006             | IFREMER, Nantes, France                                     | [32]                  | 2053      |              |
| CR1756          | ST32          | 3       | CC3A      |                    | 3               | 1    | 10   | 2    | 2    | 3    | 18   | 9    | Fresh anchovies                                   | 2008             | CERELA, Tucumán, Argentina                                  | Unpublished           |           |              |
| 741             | ST33          | 3       | CC3A      | B                  | 3               | 1    | 10   | 2    | 2    | 9    | 18   | 8    | Pork meat                                         | 1981             | INRA, Jouy-en-Josas, France                                 | [10]                  | 2181      |              |
| CRL1467         | ST34          | Admixed | CC3C      |                    | 5               | 1    | 11   | 2    | 4    | 1    | 20   | 9    | Argentinean-type dry sausage                      | 2002             | CERELA, Tucumán, Argentina                                  | [11]                  | 1954      |              |
| BMG.148         | ST35          | Admixed | CC3C      |                    | 5               | 1    | 11   | 2    | 2    | 1    | 20   | 9    | Tunisian Fresh beef meat                          | 2008             | University of Tunis, Tunis, Tunisia                         | [43]                  | 2015      |              |
| SAM202          | ST36          | Admixed | CC3C      |                    | 7               | 1    | 11   | 2    | 2    | 1    | 20   | 9    | Greek-type dry salami                             | 1994             | National Agricultural Research Foundation, Ioannina, Greece | [44]                  |           |              |
| SAM25           | ST37          | Admixed | singleton |                    | 5               | 1    | 10   | 2    | 2    | 3    | 20   | 17   | Greek-type dry salami                             | 1994             | National Agricultural Research Foundation, Ioannina, Greece | [44]                  |           |              |
| CTC163          | ST38          | Admixed | singleton | C                  | 5               | 1    | 11   | 2    | 8    | 1    | 15   | 10   | Spanish dry-type sausage                          | 1993             | IRTA, Monells, Spain                                        | [40]                  | 2301      |              |
| 371             | ST38          | Admixed | singleton |                    | 5               | 1    | 11   | 2    | 8    | 1    | 15   | 10   | Vacuum-Packed beef                                | 1987             | INRA, Jouy-en-Josas, France                                 | [37]                  |           |              |
| MFPB14D06-08    | ST39          | Admixed | singleton |                    | 5               | 1    | 11   | 2    | 6    | 11   | 15   | 10   | Modified-Atmosphere Packed beef carpaccio         | 2009             | INRA, Jouy-en-Josas, France                                 | [31]                  |           |              |
| YMW557          | ST40          | Admixed | singleton | B                  | 5               | 2    | 10   | 1    | 2    | 3    | 16   | 12   | Fresh Meat                                        | 1986             | National Institute of Health, Tokyo, Japan                  | [43]                  | 2006      |              |
| CTC6626         | ST41          | Admixed | singleton | D                  | 5               | 1    | 10   | 2    | 7    | 1    | 13   | 14   | Spanish dry-type sausage                          | 1993             | IRTA, Monells, Spain                                        | [11]                  | 1869      |              |
| MFPC40D14-02    | ST42          | Admixed | singleton |                    | 5               | 1    | 10   | 2    | 2    | 9    | 3    | 9    | Vacuum Packed beef carpaccio                      | 2009             | INRA, Jouy-en-Josas, France                                 | [31]                  |           |              |
| LTH5728         | ST43          | 1       | CC1A      | I                  | 4               | 4    | 7    | 8    | 8    | 8    | 8    | 18   | Starter strain for German-type sausages           | 2000             | Institut Für Lebensmitteltechnologie, Hohenheim, Germany    | [11]                  | 2147      |              |
| MFPA24A14-02    | ST44          | 1       | CC1A      |                    | 4               | 10   | 2    | 8    | 8    | 6    | 1    | 19   | Modified-Atmosphere Packed organic beef carpaccio | 2009             | INRA, Jouy-en-Josas, France                                 | [31]                  | 2020      |              |
| BMG.45          | ST45          | 1       | CC1A      |                    | 4               | 10   | 4    | 8    | 8    | 6    | 4    | 19   | Tunisian Beef packaged sausage                    | 2008             | University of Tunis, Tunis, Tunisia                         | [43]                  |           |              |
| MFPC16A28-01    | ST46          | 1       | CC1A      |                    | 4               | 10   | 4    | 8    | 8    | 7    | 4    | 19   | Vacuum Packed beef carpaccio                      | 2009             | INRA, Jouy-en-Josas, France                                 | [31]                  |           |              |
| MFPA44D07-04    | ST46          | 1       | CC1A      |                    | 4               | 10   | 4    | 8    | 8    | 7    | 4    | 19   | Modified-Atmosphere Packed organic beef carpaccio | 2009             | INRA, Jouy-en-Josas, France                                 | [31]                  |           |              |
| MFPA25D06-02    | ST47          | 1       | CC1A      |                    | 4               | 10   | 5    | 8    | 8    | 7    | 4    | 19   | Modified-Atmosphere Packed organic beef carpaccio | 2009             | INRA, Jouy-en-Josas, France                                 | [31]                  |           |              |
| MFPC24D15-02    | ST48          | 1       | CC1A      |                    | 4               | 10   | 8    | 8    | 8    | 6    | 9    | 20   | Vacuum Packed beef carpaccio                      | 2009             | INRA, Jouy-en-Josas, France                                 | [31]                  |           |              |
| MFPB16A14-01    | ST48          | 1       | CC1A      |                    | 4               | 10   | 8    | 8    | 8    | 6    | 9    | 20   | Modified-Atmosphere Packed beef carpaccio         | 2009             | INRA, Jouy-en-Josas, France                                 | [31]                  |           |              |
| MFPB16D07-02    | ST49          | 1       | CC1A      |                    | 4               | 12   | 8    | 8    | 8    | 6    | 9    | 20   | Modified-Atmosphere Packed beef carpaccio         | 2009             | INRA, Jouy-en-Josas, France                                 | [31]                  |           |              |
| MFPB17D07-01    | ST50          | 1       | CC1A      |                    | 4               | 12   | 8    | 8    | 8    | 2    | 9    | 20   | Modified-Atmosphere Packed beef carpaccio         | 2009             | INRA, Jouy-en-Josas, France                                 | [31]                  |           |              |
| MFPC25D15-04    | ST51          | 1       | CC1A      |                    | 4               | 10   | 4    | 8    | 8    | 6    | 9    | 9    | Vacuum Packed beef carpaccio                      | 2009             | INRA, Jouy-en-Josas, France                                 | [31]                  |           |              |
| MFPA25A12-02    | ST52          | 1       | CC1A      |                    | 4               | 10   | 8    | 8    | 8    | 6    | 8    | 9    | Modified-Atmosphere Packed beef carpaccio         | 2009             | INRA, Jouy-en-Josas, France                                 | [31]                  |           |              |
| MFPC24A28-01    | ST53          | 1       | CC1A      |                    | 4               | 12   | 8    | 8    | 8    | 6    | 6    | 9    | Vacuum Packed beef carpaccio                      | 2009             | INRA, Jouy-en-Josas, France                                 | [31]                  |           |              |
| MFPC25D15-03    | ST54          | 1       | CC1A      |                    | 4               | 10   | 8    | 8    | 8    | 6    | 6    | 21   | Vacuum Packed beef carpaccio                      | 2009             | INRA, Jouy-en-Josas, France                                 | [31]                  |           |              |
| LTH675          | ST55          | 1       | CC1A      | J                  | 4               | 5    | 4    | 8    | 8    | 3    | 6    | 8    | German-type sausage                               | 1991             | Institut Für Lebensmitteltechnologie, Hohenheim, Germany    | [48]                  | 2180      |              |
| BMG.95          | ST56          | 1       | CC1A      |                    | 4               | 10   | 4    | 8    | 8    | 3    | 8    | 8    | Tunisian salted anchovies conserved in oil        | 2008             | University of Tunis, Tunis, Tunisia                         | [43]                  | 1951      |              |
| 64              | ST57          | 1       | CC1A      | I                  | 4               | 12   | 4    | 8    | 8    | 2    | 5    | 8    | French dry-type sausage                           | 1982             | INRA, Jouy-en-Josas, France                                 | [10]                  | 2256      |              |
| BMG.136         | ST58          | 1       | CC1A      |                    | 4               | 10   | 4    | 8    | 8    | 6    | 5    | 8    | Fresh sheep meat (west of Tunisia)                | 2008             | University of Tunis, Tunis, Tunisia                         | [43]                  | 2259      |              |
| H216            | ST59          | 1       | CC1A      |                    | 4               | 11   | 4    | 8    | 9    | 6    | 6    | 8    | Fresh Meat                                        | 1986             | National Institute of Health, Tokyo, Japan                  | [43]                  |           |              |
| LTH677          | ST60          | 1       | CC1A      | I                  | 4               | 10   | 4    | 8    | 8    | 6    | 7    | 8    | German-type sausage                               | 1991             | Institut Für Lebensmitteltechnologie, Hohenheim, Germany    | [48]                  | 2309      |              |
| CTC6429         | ST61          | 1       | CC1A      | I                  | 4               | 10   | 2    | 8    | 8    | 6    | 7    | 8    | Spanish dry-type sausage                          | 1993             | IRTA, Monells, Spain                                        | [11]                  | 2278      |              |
| 33              | ST62          | 1       | CC1A      | I                  | 4               | 7    | 4    | 8    | 8    | 7    | 7    | 8    | French dry-type sausage                           | 1990-1992        | INRA, Jouy-en-Josas, France                                 | [10]                  | 2103      |              |
| BMG.120         | ST63          | 1       | CC1A      |                    | 4               | 10   | 9    | 8    | 8    | 6    | 6    | 8    | Tunisian Beef merguez                             | 2008             | University of Tunis, Tunis, Tunisia                         | [43]                  | 1951      |              |
| R29836          | ST64          | 1       | CC1A      |                    | 4               | 10   | 9    | 8    | 8    | 6    | 5    | 9    | Traditionnal Belgian sourdough                    | 2008             | Vrij Universiteit, Brussels, Belgium                        | [45]                  |           |              |
| R29849          | ST64          | 1       | CC1A      |                    | 4               | 10   | 9    | 8    | 8    | 6    | 5    | 9    | Traditionnal Belgian sourdough                    | 2008             | Vrij Universiteit, Brussels, Belgium                        | [45]                  |           |              |
| AUA-20087       | ST64          | 1       | CC1A      |                    | 4               | 10   | 9    | 8    | 8    | 6    | 5    | 9    | Industrial dry-type Greek sausages                | 2004             | Agricultural University, Athens, Greece                     | Unpublished           |           |              |

| Name of Isolate | Sequence Type | Lineage | Clade     | Genotype [ref. 11] | Allelic profile |      |      |      |      |      |      |      | Isolation source                                  | Date      | Laboratory Collection                                     | Reference   | Genome in kb |
|-----------------|---------------|---------|-----------|--------------------|-----------------|------|------|------|------|------|------|------|---------------------------------------------------|-----------|-----------------------------------------------------------|-------------|--------------|
|                 |               |         |           |                    | tuf             | recA | glpF | pepV | ldhL | rpoB | dnaK | hemN |                                                   |           |                                                           |             |              |
| CRL1755         | ST65          | 1       | CC1A      |                    | 4               | 10   | 9    | 8    | 8    | 6    | 6    | 9    | Fresh anchovies                                   | 2008      | CERELA, Tucumán, Argentina                                | Unpublished |              |
| MFPB16D07-04    | ST66          | 1       | CC1A      |                    | 4               | 10   | 4    | 8    | 8    | 1    | 6    | 9    | Modified-Atmosphere Packed beef carpaccio         | 2009      | INRA, Jouy-en-Josas, France                               | [31]        |              |
| BMG. 107        | ST67          | Admixed | singleton |                    | 4               | 10   | 9    | 8    | 4    | 3    | 6    | 9    | Tunisian Turkey packaged sausage with garlic      | 2008      | University of Tunis, Tunis, Tunisia                       | [43]        | 2090         |
| MFPA29A14-01    | ST68          | 1       | singleton |                    | 4               | 5    | 4    | 7    | 7    | 5    | 5    | 2    | Modified-Atmosphere Packed organic beef carpaccio | 2009      | INRA, Jouy-en-Josas, France                               | [31]        |              |
| MFPC40A28-04    | ST69          | Admixed | singleton |                    | 5               | 5    | 1    | 2    | 7    | 3    | 5    | 2    | Vacuum Packed beef carpaccio                      | 2009      | INRA, Jouy-en-Josas, France                               | [31]        |              |
| LTH2070         | ST70          | Admixed | singleton | I                  | 4               | 5    | 4    | 5    | 4    | 1    | 11   | 2    | Sauerkraut                                        | Not known | Institut Für Libbensmitteltechnologie, Hohenheim, Germany | [11]        | 2150         |
| LTH2076         | ST71          | Admixed | singleton |                    | 4               | 6    | 4    | 5    | 4    | 1    | 11   | 2    | Sauerkraut                                        | Not known | Institut Für Libbensmitteltechnologie, Hohenheim, Germany | [11]        |              |
| ATCC15521       | ST72          | 1       | CC1A      | J                  | 4               | 10   | 4    | 8    | 8    | 6    | 6    | 2    | Fermented sake beverage                           | 1934      | American Type Culture Collection                          |             | 1925         |
| LTH938          | ST72          | 1       | CC1A      |                    | 4               | 10   | 4    | 8    | 8    | 6    | 6    | 2    | German-type sausage                               | 1991      | Institut Für Libbensmitteltechnologie, Hohenheim, Germany | [48]        |              |
| 175             | ST72          | 1       | CC1A      |                    | 4               | 10   | 4    | 8    | 8    | 6    | 6    | 2    | French dry-type sausage                           | 1990-1992 | INRA, Jouy-en-Josas, France                               | [10]        |              |
| R29873          | ST73          | 1       | CC1A      |                    | 4               | 10   | 9    | 8    | 8    | 6    | 6    | 2    | Traditionnal Belgian sourdough                    | 2008      | Vrij Universiteit, Brussels, Belgium                      | [45]        |              |
| MFPA43D07-01    | ST73          | 1       | CC1A      |                    | 4               | 10   | 9    | 8    | 8    | 6    | 6    | 2    | Modified-Atmosphere Packed organic beef carpaccio | 2009      | INRA, Jouy-en-Josas, France                               | [31]        |              |
| MFPA25D06-01    | ST73          | 1       | CC1A      |                    | 4               | 10   | 9    | 8    | 8    | 6    | 6    | 2    | Modified-Atmosphere Packed organic beef carpaccio | 2009      | INRA, Jouy-en-Josas, France                               | [31]        |              |
| MFPA19A15-01    | ST74          | 1       | CC1A      |                    | 4               | 8    | 5    | 8    | 8    | 6    | 6    | 2    | Modified-Atmosphere Packed organic beef carpaccio | 2009      | INRA, Jouy-en-Josas, France                               | [31]        |              |
| TISTR890        | ST75          | 1       | CC1A      | J                  | 4               | 7    | 4    | 8    | 8    | 6    | 6    | 2    | Taiwanese pork Nam product                        | 1983      | Mahidol University, Bangkok, Thailand                     | [10]        | 1878         |
| BMG. 101        | ST76          | 1       | CC1A      |                    | 4               | 10   | 4    | 8    | 8    | 1    | 6    | 7    | Tunisian Turkey packaged ham                      | 2008      | University of Tunis, Tunis, Tunisia                       | [43]        |              |
| 31              | ST77          | Admixed | singleton |                    | 5               | 10   | 10   | 6    | 4    | 1    | 1    | 6    | French dry-type sausage                           | 1990-1992 | INRA, Jouy-en-Josas, France                               | [10]        |              |
| BMG.37          | ST78          | Admixed | singleton |                    | 5               | 13   | 10   | 2    | 7    | 9    | 5    | 2    | Fresh sheep meat (east of Tunisia)                | 2008      | University of Tunis, Tunis, Tunisia                       | [43]        | 1897         |
| MFPA17D07-02    | ST79          | 2       | CC2b      |                    | 5               | 12   | 10   | 2    | 4    | 1    | 10   | 14   | Modified-Atmosphere Packed organic beef carpaccio | 2009      | INRA, Jouy-en-Josas, France                               | [31]        |              |
| CTC335          | ST80          | 2       | CC2b      | E                  | 5               | 12   | 11   | 2    | 4    | 1    | 14   | 10   | Spanish dry-type sausage                          | 1993      | IRTA, Monells, Spain                                      | [40]        | 1952         |
| SF770           | ST81          | 2       | CC2b      | E                  | 5               | 12   | 11   | 2    | 4    | 1    | 10   | 12   | Smoked Salmon                                     | 2006      | IFREMER, Nantes, France                                   | [32]        | 2077         |
| SF842           | ST81          | 2       | CC2b      | E                  | 5               | 12   | 11   | 2    | 4    | 1    | 10   | 12   | Smoked Salmon                                     | 2006      | IFREMER, Nantes, France                                   | [32]        | 2020         |
| SF771           | ST81          | 2       | CC2b      | E                  | 5               | 12   | 11   | 2    | 4    | 1    | 10   | 12   | Smoked Salmon                                     | 2006      | IFREMER, Nantes, France                                   | [32]        |              |
| MFPA29D07-02    | ST82          | 2       | CC2c      |                    | 5               | 12   | 10   | 2    | 2    | 1    | 3    | 9    | Modified-Atmosphere Packed organic beef carpaccio | 2009      | INRA, Jouy-en-Josas, France                               | [31]        |              |
| MFPC40D14-04    | ST83          | 2       | CC2c      |                    | 5               | 13   | 10   | 2    | 4    | 9    | 3    | 9    | Vacuum Packed beef carpaccio                      | 2009      | INRA, Jouy-en-Josas, France                               | [31]        |              |
| MFPC40A28-03    | ST83          | 2       | CC2c      |                    | 5               | 13   | 10   | 2    | 4    | 9    | 3    | 9    | Vacuum Packed beef carpaccio                      | 2009      | INRA, Jouy-en-Josas, France                               | [31]        |              |
| MFPA42A14-05    | ST83          | 2       | CC2c      |                    | 5               | 13   | 10   | 2    | 4    | 9    | 3    | 9    | Modified-Atmosphere Packed organic beef carpaccio | 2009      | INRA, Jouy-en-Josas, France                               | [31]        |              |
| FLECO2          | ST84          | 2       | CC2c      |                    | 5               | 13   | 10   | 2    | 2    | 9    | 3    | 9    | Modified-Atmosphere Packed beef carpaccio         | 2008      | INRA, Jouy-en-Josas, France                               | Unpublished |              |
| MFPB42D06-02    | ST84          | 2       | CC2c      |                    | 5               | 13   | 10   | 2    | 2    | 9    | 3    | 9    | Modified-Atmosphere Packed beef carpaccio         | 2008      | INRA, Jouy-en-Josas, France                               | [31]        |              |
| 381             | ST85          | 2       | CC2c      |                    | 5               | 13   | 10   | 2    | 4    | 2    | 3    | 9    | Vacuum-Packed pork                                | 1987      | INRA, Jouy-en-Josas, France                               | [37]        |              |
| 160*1           | ST86          | 2       | CC2c      | C                  | 5               | 13   | 10   | 2    | 2    | 2    | 3    | 9    | Horse meat                                        | 1982      | INRA, Jouy-en-Josas, France                               | [10]        | 1890         |
| LTH5590         | ST86          | 2       | CC2c      | C                  | 5               | 13   | 10   | 2    | 2    | 2    | 3    | 9    | Human feces                                       | 2002      | Institut Für Libbensmitteltechnologie, Hohenheim, Germany | [39]        | 1915         |
| BMG. 106        | ST86          | 2       | CC2c      |                    | 5               | 13   | 10   | 2    | 2    | 2    | 3    | 9    | Tunisian Turkey packaged sausage with garlic      | 2008      | University of Tunis, Tunis, Tunisia                       | [43]        | 1895         |
| AGR48           | ST86          | 2       | CC2c      | C                  | 5               | 13   | 10   | 2    | 2    | 2    | 3    | 9    | Chilled lamb meat                                 | 2007      | AgResearch, Hamilton, New-Zealand                         | [11]        | 1943         |
| CTC014          | ST86          | 2       | CC2c      | C                  | 5               | 13   | 10   | 2    | 2    | 2    | 3    | 9    | Spanish dry-type sausage                          | 1993      | IRTA, Monells, Spain                                      | [40]        | 2038         |
| BMG. 164        | ST86          | 2       | CC2c      |                    | 5               | 13   | 10   | 2    | 2    | 2    | 3    | 9    | Tunisian dried salted Octopus                     | 2008      | University of Tunis, Tunis, Tunisia                       | [47]        | 1866         |
| GV1             | ST86          | 2       | CC2c      |                    | 5               | 13   | 10   | 2    | 2    | 2    | 3    | 9    | Dry cured ham                                     | 1981      | INRA, Jouy-en-Josas, France                               | [10]        |              |
| HC4             | ST86          | 2       | CC2c      |                    | 5               | 13   | 10   | 2    | 2    | 2    | 3    | 9    | Ground-beef                                       | 1991      | INRA, Jouy-en-Josas, France                               | [10]        |              |
| BMG. 170        | ST86          | 2       | CC2c      |                    | 5               | 13   | 10   | 2    | 2    | 2    | 3    | 9    | Tunisian Fresh pork meat                          | 2008      | University of Tunis, Tunis, Tunisia                       | [43]        | 1886         |
| MFPB29D07-01    | ST86          | 2       | CC2c      |                    | 5               | 13   | 10   | 2    | 2    | 2    | 3    | 9    | Modified-Atmosphere Packed beef carpaccio         | 2008      | INRA, Jouy-en-Josas, France                               | [31]        |              |
| 378             | ST87          | 2       | CC2b      |                    | 5               | 12   | 11   | 8    | 4    | 1    | 3    | 10   | Vacuum-Packed pork                                | 1987      | INRA, Jouy-en-Josas, France                               | [37]        |              |
| MFPA25A12-06    | ST88          | 2       | singleton |                    | 8               | 10   | 10   | 6    | 4    | 3    | 20   | 15   | Modified-Atmosphere Packed organic beef carpaccio | 2009      | INRA, Jouy-en-Josas, France                               | [31]        |              |
| AGR47           | ST89          | 2       | singleton |                    | 5               | 10   | 10   | 6    | 4    | 1    | 21   | 14   | Chilled lamb meat                                 | 2007      | AgResearch, Hamilton, New-Zealand                         | [11]        |              |
| AGR51           | ST89          | 2       | singleton | H                  | 5               | 10   | 10   | 6    | 4    | 1    | 21   | 14   | Chilled lamb meat                                 | 2007      | AgResearch, Hamilton, New-Zealand                         | [11]        | 2038         |
| 14              | ST90          | Admixed | singleton | G                  | 4               | 5    | 10   | 8    | 2    | 1    | 21   | 14   | French dry-type sausage                           | 1990-1992 | INRA, Jouy-en-Josas, France                               | [10]        | 2044         |
| 18              | ST90          | Admixed | singleton | G                  | 4               | 5    | 10   | 8    | 2    | 1    | 21   | 14   | French dry-type sausage                           | 1990-1992 | INRA, Jouy-en-Josas, France                               | [10]        | 2053         |
| AUA-M5M8.6      | ST91          | 2       | singleton |                    | 5               | 13   | 10   | 2    | 4    | 9    | 20   | 12   | Chilled minced beef meat                          | 2008      | Agricultural University, Athens, Greece                   | Unpublished |              |
| 21              | ST92          | 2       | singleton | J                  | 5               | 10   | 10   | 8    | 4    | 9    | 20   | 14   | French dry-type sausage                           | 1990-1992 | INRA, Jouy-en-Josas, France                               | [10]        | 2043         |
| MFPA42D07-04    | ST93          | 2       | singleton |                    | 1               | 9    | 10   | 2    | 7    | 10   | 16   | 16   | Modified-Atmosphere Packed organic beef carpaccio | 2009      | INRA, Jouy-en-Josas, France                               | [31]        |              |
| 495             | ST94          | 2       | singleton | E                  | 1               | 12   | 10   | 2    | 8    | 10   | 16   | 16   | Vacuum-Packed pork                                | 1987      | INRA, Jouy-en-Josas, France                               | [37]        | 1887         |
| YMW540          | ST95          | Admixed | singleton | E                  | 1               | 12   | 5    | 2    | 7    | 10   | 16   | 14   | Fresh Meat                                        | 1986      | National Institute of Health, Tokyo, Japan                | [43]        | 2040         |
| MF1053          | ST96          | Admixed | singleton |                    | 1               | 12   | 10   | 2    | 2    | 6    | 17   | 2    | Fermented trout (Rakfisk)                         | 2004      | NOFIMA, Ås, Norway                                        | [50]        | 2045         |
| Lb674           | ST96          | Admixed | singleton |                    | 1               | 12   | 10   | 2    | 2    | 6    | 17   | 2    | Fresh meat                                        | 1989      | Federal Center For Meat Research, Kulmbach, Germany       | [50]        | 2038         |

| Name of Isolate | Sequence Type | Lineage | Clade     | Genotype [ref. 11] | Allelic profile |      |      |      |      |      |      |      | Isolation source                                  | Date      | Laboratory Collection                                       | Reference   | Genome in kb |
|-----------------|---------------|---------|-----------|--------------------|-----------------|------|------|------|------|------|------|------|---------------------------------------------------|-----------|-------------------------------------------------------------|-------------|--------------|
|                 |               |         |           |                    | tuf             | recA | glpF | pepV | ldhL | rpoB | dnaK | hemN |                                                   |           |                                                             |             |              |
| MFPB42D06-01    | ST97          | Admixed | singleton |                    | 1               | 12   | 10   | 3    | 7    | 12   | 16   | 3    | Modified-Atmosphere Packed beef carpaccio         | 2008      | INRA, Jouy-en-Josas, France                                 | [31]        | 1900         |
| BMG.40          | ST98          | Admixed | singleton |                    | 2               | 5    | 10   | 2    | 4    | 3    | 20   | 2    | Tunisian Beef packaged salami                     | 2008      | University of Tunis, Tunis, Tunisia                         | [43]        |              |
| G3              | ST99          | 2       | CC2B      | D                  | 6               | 12   | 10   | 2    | 4    | 1    | 20   | 12   | Ground beef                                       | 1990      | INRA, Jouy-en-Josas, France                                 | [10]        | 2094         |
| AGR53           | ST99          | 2       | CC2B      | F                  | 6               | 12   | 10   | 2    | 4    | 1    | 20   | 12   | Chilled lamb meat                                 | 2007      | AgResearch, Hamilton, New-Zealand                           | [11]        | 2116         |
| JOUY-181        | ST99          | 2       | CC2B      |                    | 6               | 12   | 10   | 2    | 4    | 1    | 20   | 12   | French dry-type sausage                           | 1990-1992 | INRA, Jouy-en-Josas, France                                 | [10]        | 2143         |
| LTH1764         | ST99          | 2       | CC2B      | D                  | 6               | 12   | 10   | 2    | 4    | 1    | 20   | 12   | Sauerkraut                                        | Not known | Institut Für Libbensmitteltechnologie, Hohenheim, Germany   | [11]        |              |
| S9              | ST99          | 2       | CC2B      |                    | 6               | 12   | 10   | 2    | 4    | 1    | 20   | 12   | Ground beef                                       | 1985      | INRA, Jouy-en-Josas, France                                 | [10]        |              |
| MFPB19A15-01    | ST99          | 2       | CC2B      |                    | 6               | 12   | 10   | 2    | 4    | 1    | 20   | 12   | Modified-Atmosphere Packed beef carpaccio         | 2008      | INRA, Jouy-en-Josas, France                                 | [31]        | 2081         |
| Lb706           | ST100         | 2       | CC2B      | F                  | 6               | 12   | 10   | 2    | 4    | 3    | 20   | 12   | Fresh meat                                        | 1989      | Federal Center For Meat Research, Kulmbach, Germany         | [50]        |              |
| Lb790x          | ST101         | 2       | CC2B      |                    | 6               | 12   | 2    | 2    | 4    | 3    | 20   | 12   | Fresh meat                                        | 1989      | Federal Center For Meat Research, Kulmbach, Germany         | [50]        |              |
| MFPA42A14-01    | ST102         | 2       | CC2B      |                    | 6               | 12   | 2    | 2    | 4    | 3    | 20   | 13   | Modified-Atmosphere Packed organic beef carpaccio | 2009      | INRA, Jouy-en-Josas, France                                 | [31]        | 2205         |
| LTH939          | ST103         | 2       | CC2B      |                    | 6               | 12   | 3    | 2    | 4    | 3    | 20   | 12   | German-type sausage                               | 1991      | Institut Für Libbensmitteltechnologie, Hohenheim, Germany   | [48]        |              |
| 156             | ST104         | 2       | CC2B      | H                  | 6               | 12   | 10   | 2    | 4    | 4    | 20   | 12   | French dry-type sausage                           | 1990-1992 | INRA, Jouy-en-Josas, France                                 | [10]        | 2094         |
| LV82            | ST104         | 2       | CC2B      |                    | 6               | 12   | 10   | 2    | 4    | 4    | 20   | 12   | Bacon                                             | 1983      | Meat Research Institute, Bristol, UK                        | [47]        |              |
| BMG.105         | ST104         | 2       | CC2B      |                    | 6               | 12   | 10   | 2    | 4    | 4    | 20   | 12   | Tunisian Beef packaged sausage                    | 2008      | University of Tunis, Tunis, Tunisia                         | [43]        | 1884         |
| AGR46           | ST104         | 2       | CC2B      | H                  | 6               | 12   | 10   | 2    | 4    | 4    | 20   | 12   | Chilled lamb meat                                 | 2007      | AgResearch, Hamilton, New-Zealand                           | [11]        |              |
| SAM129          | ST104         | 2       | CC2B      |                    | 6               | 12   | 10   | 2    | 4    | 4    | 20   | 12   | Greek-type dry salami                             | 1994      | National Agricultural Research Foundation, Ioannina, Greece | [48]        | 2098         |
| 174             | ST104         | 2       | CC2B      |                    | 6               | 12   | 10   | 2    | 4    | 4    | 20   | 12   | French dry-type sausage                           | 1990-1992 | INRA, Jouy-en-Josas, France                                 | [10]        |              |
| LTH945          | ST104         | 2       | CC2B      |                    | 6               | 12   | 10   | 2    | 4    | 4    | 20   | 12   | German-type sausage                               | 1991      | Institut Für Libbensmitteltechnologie, Hohenheim, Germany   | [48]        | 1973         |
| BMG.138         | ST104         | 2       | CC2B      |                    | 6               | 12   | 10   | 2    | 4    | 4    | 20   | 12   | Fresh sheep meat (west of Tunisia)                | 2008      | University of Tunis, Tunis, Tunisia                         | [43]        |              |
| BMG.115         | ST104         | 2       | CC2B      |                    | 6               | 12   | 10   | 2    | 4    | 4    | 20   | 12   | Tunisian Sheep dried meat                         | 2008      | University of Tunis, Tunis, Tunisia                         | [43]        | 1847         |
| LV21            | ST104         | 2       | CC2B      | F                  | 6               | 12   | 10   | 2    | 4    | 4    | 20   | 12   | Vacuum-packed pork meat                           | 1983      | Meat Research Institute, Bristol, UK                        | [47]        |              |
| CTC494          | ST104         | 2       | CC2B      | B                  | 6               | 12   | 10   | 2    | 4    | 4    | 20   | 12   | Spanish dry-type sausage                          | 1993      | IRTA, Monells, Spain                                        | [40]        | 1851         |
| SAM148          | ST104         | 2       | CC2B      |                    | 6               | 12   | 10   | 2    | 4    | 4    | 20   | 12   | Greek-type dry salami                             | 1994      | National Agricultural Research Foundation, Ioannina, Greece | [44]        |              |
| AGR42           | ST104         | 2       | CC2B      |                    | 6               | 12   | 10   | 2    | 4    | 4    | 20   | 12   | Chilled lamb meat                                 | 2007      | AgResearch, Hamilton, New-Zealand                           | [11]        | Unpublished  |
| ADIV-IM8        | ST104         | 2       | CC2B      |                    | 6               | 12   | 10   | 2    | 4    | 4    | 20   | 12   | Traditional dry-type French Sausage               | Not known | ADIV, Clermont-Ferrand, France                              |             |              |
| ADIV-L2         | ST104         | 2       | CC2B      |                    | 6               | 12   | 10   | 2    | 4    | 4    | 20   | 12   | Industrial dry-type French Sausage                | Not known | ADIV, Clermont-Ferrand, France                              |             |              |
| MFPA29A14-04    | ST104         | 2       | CC2B      |                    | 6               | 12   | 10   | 2    | 4    | 4    | 20   | 12   | Modified-Atmosphere Packed organic beef carpaccio | 2009      | INRA, Jouy-en-Josas, France                                 | [31]        | 1884         |
| MFPA29D07-03    | ST104         | 2       | CC2B      |                    | 6               | 12   | 10   | 2    | 4    | 4    | 20   | 12   | Modified-Atmosphere Packed organic beef carpaccio | 2009      | INRA, Jouy-en-Josas, France                                 | [31]        |              |
| MFZ088          | ST105         | 2       | CC2B      | B                  | 6               | 12   | 12   | 2    | 4    | 4    | 20   | 12   | Fermented trout (Rakfisk)                         | 2004      | NOFIMA, Ås, Norway                                          | [11]        | 2010         |
| MFPB17D07-07    | ST106         | 2       | 2B        |                    | 9               | 12   | 10   | 2    | 4    | 4    | 20   | 12   | Modified-Atmosphere Packed beef carpaccio         | 2009      | INRA, Jouy-en-Josas, France                                 | [30]        |              |
| CTC041          | ST107         | 2       | CC2A      | A                  | 5               | 12   | 5    | 2    | 6    | 1    | 15   | 10   | Spanish dry-type sausage                          | 1993      | IRTA, Monells, Spain                                        | [40]        | 1856         |
| TISTR911        | ST107         | 2       | CC2A      | A                  | 5               | 12   | 5    | 2    | 6    | 1    | 15   | 10   | Taiwanese pork Nam product                        | 1983      | Mahidol University, Bangkok, Thailand                       | [10]        |              |
| 504             | ST107         | 2       | CC2A      | A                  | 5               | 12   | 5    | 2    | 6    | 1    | 15   | 10   | Vacuum-Packed pork                                | 1987      | INRA, Jouy-en-Josas, France                                 | [37]        | 1838         |
| YME344          | ST107         | 2       | CC2A      | A                  | 5               | 12   | 5    | 2    | 6    | 1    | 15   | 10   | Fresh Meat                                        | 1986      | National Institute of Health, Tokyo, Japan                  | [43]        |              |
| CTC287          | ST107         | 2       | CC2A      | A                  | 5               | 12   | 5    | 2    | 6    | 1    | 15   | 10   | Spanish dry-type sausage                          | 1993      | IRTA, Monells, Spain                                        | [40]        | 1884         |
| AUA-605         | ST107         | 2       | CC2A      |                    | 5               | 12   | 5    | 2    | 6    | 1    | 15   | 10   | Industrial dry-type Greek sausages                | 2007      | Agricultural University, Athens, Greece                     | Unpublished |              |
| AUA-737         | ST107         | 2       | CC2A      |                    | 5               | 12   | 5    | 2    | 6    | 1    | 15   | 10   | Industrial dry-type Greek sausages                | 2007      | Agricultural University, Athens, Greece                     | Unpublished | 1814         |
| CTC427          | ST107         | 2       | CC2A      | A                  | 5               | 12   | 5    | 2    | 6    | 1    | 15   | 10   | Spanish dry-type sausage                          | 1993      | IRTA, Monells, Spain                                        | [40]        |              |
| MFPC16D14-01    | ST107         | 2       | CC2A      |                    | 5               | 12   | 5    | 2    | 6    | 1    | 15   | 10   | Vacuum Packed beef carpaccio                      | 2009      | INRA, Jouy-en-Josas, France                                 | [31]        | 1964         |
| ADIV-L152       | ST108         | 2       | CC2A      |                    | 5               | 12   | 5    | 2    | 7    | 1    | 15   | 10   | Farm dry-type French Sausage                      | Not known | ADIV, Clermont-Ferrand, France                              | Unpublished |              |
| MFPC14D14-01    | ST108         | 2       | CC2A      |                    | 5               | 12   | 5    | 2    | 7    | 1    | 15   | 10   | Vacuum Packed beef carpaccio                      | 2009      | INRA, Jouy-en-Josas, France                                 | [31]        | 1884         |
| MFPC15D14-02    | ST108         | 2       | CC2A      |                    | 5               | 12   | 5    | 2    | 7    | 1    | 15   | 10   | Vacuum Packed beef carpaccio                      | 2009      | INRA, Jouy-en-Josas, France                                 | [31]        |              |
| MFPA22D06-01    | ST108         | 2       | CC2A      |                    | 5               | 12   | 5    | 2    | 7    | 1    | 15   | 10   | Modified-Atmosphere Packed organic beef carpaccio | 2009      | INRA, Jouy-en-Josas, France                                 | [31]        | 1884         |
| MFPB15D06-04    | ST108         | 2       | CC2A      |                    | 5               | 12   | 5    | 2    | 7    | 1    | 15   | 10   | Modified-Atmosphere Packed beef carpaccio         | 2009      | INRA, Jouy-en-Josas, France                                 | [31]        |              |
| MFPC14A29-01    | ST108         | 2       | CC2A      |                    | 5               | 12   | 5    | 2    | 7    | 1    | 15   | 10   | Vacuum Packed beef carpaccio                      | 2009      | INRA, Jouy-en-Josas, France                                 | [31]        | 1884         |
| MFPA15A12-01    | ST108         | 2       | CC2A      |                    | 5               | 12   | 5    | 2    | 7    | 1    | 15   | 10   | Modified-Atmosphere Packed organic beef carpaccio | 2009      | INRA, Jouy-en-Josas, France                                 | [31]        |              |
| MFPC24D15-03    | ST108         | 2       | CC2A      |                    | 5               | 12   | 5    | 2    | 7    | 1    | 15   | 10   | Vacuum Packed beef carpaccio                      | 2009      | INRA, Jouy-en-Josas, France                                 | [31]        | 1934         |
| MFPB14D06-01    | ST108         | 2       | CC2A      |                    | 5               | 12   | 5    | 2    | 7    | 1    | 15   | 10   | Modified-Atmosphere Packed beef carpaccio         | 2009      | INRA, Jouy-en-Josas, France                                 | [31]        |              |
| 300             | ST109         | 2       | CC2A      | A                  | 5               | 12   | 5    | 2    | 4    | 11   | 15   | 10   | Vacuum-Packed beef                                | 1987      | INRA, Jouy-en-Josas, France                                 | [37]        | 1934         |
| 518             | ST109         | 2       | CC2A      |                    | 5               | 12   | 5    | 2    | 4    | 11   | 15   | 10   | Vacuum-Packed pork                                | 1987      | INRA, Jouy-en-Josas, France                                 | [37]        |              |
| SAM526          | ST110         | 2       | CC2A      |                    | 5               | 12   | 6    | 2    | 2    | 11   | 15   | 10   | Greek-type dry salami                             | 1994      | National Agricultural Research Foundation, Ioannina, Greece | [44]        | 1934         |
| MFPC41A28-07    | ST111         | 2       | CC2A      |                    | 5               | 12   | 5    | 2    | 2    | 11   | 15   | 10   | Vacuum Packed beef carpaccio                      | 2009      | INRA, Jouy-en-Josas, France                                 | [31]        |              |

| Name of Isolate | Sequence Type | Lineage | Clade | Genotype [ref. 11] | Allelic profile |             |             |             |             |             |             |             | Isolation source                                  | Date      | Laboratory Collection                      | Reference   | Genome in kb |
|-----------------|---------------|---------|-------|--------------------|-----------------|-------------|-------------|-------------|-------------|-------------|-------------|-------------|---------------------------------------------------|-----------|--------------------------------------------|-------------|--------------|
|                 |               |         |       |                    | <i>tuf</i>      | <i>recA</i> | <i>glpF</i> | <i>pepV</i> | <i>ldhL</i> | <i>rpoB</i> | <i>dnaK</i> | <i>hemN</i> |                                                   |           |                                            |             |              |
| MFPC14A29-04    | ST111         | 2       | CC2A  |                    | 5               | 12          | 5           | 2           | 2           | 11          | 15          | 10          | Vacuum Packed beef carpaccio                      | 2009      | INRA, Jouy-en-Josas, France                | [31]        |              |
| AUA-MOM4.1      | ST112         | 2       | CC2A  |                    | 5               | 12          | 5           | 2           | 6           | 11          | 12          | 10          | Chilled minced beef meat                          | 2008      | Agricultural University, Athens, Greece    | Unpublished |              |
| ADIV-LB10       | ST113         | 2       | CC2A  |                    | 5               | 12          | 5           | 2           | 6           | 11          | 15          | 11          | Fresh pork meat from industrial producer          | 2005      | ADIV, Clermont-Ferrand, France             | Unpublished |              |
| LV5             | ST114         | 2       | CC2A  | A                  | 5               | 12          | 5           | 2           | 6           | 11          | 15          | 10          | Vacuum-packed pork meat                           | 1983      | Meat Research Institute, Bristol, UK       | [47]        | 1911         |
| 557             | ST114         | 2       | CC2A  |                    | 5               | 12          | 5           | 2           | 6           | 11          | 15          | 10          | Vacuum-Packed pork                                | 1987      | INRA, Jouy-en-Josas, France                | [37]        |              |
| CRL1758         | ST114         | 2       | CC2A  |                    | 5               | 12          | 5           | 2           | 6           | 11          | 15          | 10          | Fresh anchovies                                   | 2008      | CERELA, Tucumán, Argentina                 | Unpublished |              |
| MFPA24D07-01    | ST114         | 2       | CC2A  |                    | 5               | 12          | 5           | 2           | 6           | 11          | 15          | 10          | Modified-Atmosphere Packed organic beef carpaccio | 2009      | INRA, Jouy-en-Josas, France                | [31]        |              |
| MFPB29A14-05    | ST114         | 2       | CC2A  |                    | 5               | 12          | 5           | 2           | 6           | 11          | 15          | 10          | Modified-Atmosphere Packed beef carpaccio         | 2009      | INRA, Jouy-en-Josas, France                | [31]        |              |
| MFPC24D15-01    | ST114         | 2       | CC2A  |                    | 5               | 12          | 5           | 2           | 6           | 11          | 15          | 10          | Vacuum Packed beef carpaccio                      | 2009      | INRA, Jouy-en-Josas, France                | [31]        |              |
| MFPC24A28-02    | ST114         | 2       | CC2A  |                    | 5               | 12          | 5           | 2           | 6           | 11          | 15          | 10          | Vacuum Packed beef carpaccio                      | 2009      | INRA, Jouy-en-Josas, France                | [31]        |              |
| MFPC23A29-01    | ST114         | 2       | CC2A  |                    | 5               | 12          | 5           | 2           | 6           | 11          | 15          | 10          | Vacuum Packed beef carpaccio                      | 2009      | INRA, Jouy-en-Josas, France                | [31]        |              |
| MFPA25A12-01    | ST114         | 2       | CC2A  |                    | 5               | 12          | 5           | 2           | 6           | 11          | 15          | 10          | Modified-Atmosphere Packed organic beef carpaccio | 2009      | INRA, Jouy-en-Josas, France                | [31]        |              |
| 72              | ST115         | 2       | CC2A  | A                  | 5               | 12          | 5           | 2           | 6           | 12          | 3           | 10          | French dry-type sausage                           | 1990-1992 | INRA, Jouy-en-Josas, France                | [10]        | 1826         |
| 23K             | ST116         | 2       | CC2A  |                    | 5               | 12          | 5           | 2           | 6           | 12          | 15          | 10          | French dry-type sausage                           | 1990-1992 | INRA, Jouy-en-Josas, France                | [10]        | 1886         |
| LV34            | ST116         | 2       | CC2A  | A                  | 5               | 12          | 5           | 2           | 6           | 12          | 15          | 10          | Vacuum-packed beef meat                           | 1983      | Meat Research Institute, Bristol, UK       | [47]        | 1903         |
| V553            | ST116         | 2       | CC2A  | A                  | 5               | 12          | 5           | 2           | 6           | 12          | 15          | 10          | Fresh Meat                                        | 1986      | National Institute of Health, Tokyo, Japan | [43]        | 1905         |
| MFPA25A12-08    | ST116         | 2       | CC2A  |                    | 5               | 12          | 5           | 2           | 6           | 12          | 15          | 10          | Modified-Atmosphere Packed organic beef carpaccio | 2009      | INRA, Jouy-en-Josas, France                | [31]        |              |
| MFPA17D07-01    | ST116         | 2       | CC2A  |                    | 5               | 12          | 5           | 2           | 6           | 12          | 15          | 10          | Modified-Atmosphere Packed organic beef carpaccio | 2009      | INRA, Jouy-en-Josas, France                | [31]        |              |
| MFPC14D14-04    | ST116         | 2       | CC2A  |                    | 5               | 12          | 5           | 2           | 6           | 12          | 15          | 10          | Vacuum Packed beef carpaccio                      | 2009      | INRA, Jouy-en-Josas, France                | [31]        |              |
| MFPB11D07-03    | ST116         | 2       | CC2A  |                    | 5               | 12          | 5           | 2           | 6           | 12          | 15          | 10          | Modified-Atmosphere Packed beef carpaccio         | 2009      | INRA, Jouy-en-Josas, France                | [31]        |              |
